# Supplementary material for: A key performance indicators redefinition initiative at a school of pharmacy using a modified Delphi consensus technique
Source: PubMed Central journal article supplement — Pharm Pract (Granada). 2020 Nov 24;18(4):2120. doi: 10.18549/PharmPract.2020.4.2120 (PMC7699828; doi:10.18549/pharmpract.2020.4.2120), 2020-11-24
Supplement: pharmpract-18-2120-suppl.pdf [file pharmpract-18-2120-suppl.pdf]

**Online Appendix. Percentage of respondents ranking each item as essential (+) or non-essential (-) key performance indicator during the three Delphi rounds.**

The colors reflect consensus achieved for items considered essential (green) or non-essential (red). The gray shade means that items were not assessed, and white cells mean that consensus was not attained among respondents.

| Key Performance Indicator                                                                                                                                                                                                  | Delphi Round         |                      |                      |
|----------------------------------------------------------------------------------------------------------------------------------------------------------------------------------------------------------------------------|----------------------|----------------------|----------------------|
|                                                                                                                                                                                                                            | R1<br>(≥90%)<br>n=49 | R2<br>(≥80%)<br>n=51 | R3<br>(≥75%)<br>n=42 |
| <b>Module 1: Admissions</b>                                                                                                                                                                                                |                      |                      |                      |
| Total number of PharmD applications*                                                                                                                                                                                       | mandatory            | mandatory            | mandatory            |
| Comprehensive score by the Pharmacy College Application Services (PharmCAS) applicant scoring system                                                                                                                       | 51.6% (-)            | 51.2% (-)            | 65.7% (-)            |
| Mean cumulative undergraduate GPA of entering class                                                                                                                                                                        | 72.5% (+)            | 83.0% (+)            |                      |
| Mean cumulative undergraduate science GPA of entering class                                                                                                                                                                | 60.0% (+)            | 73.9% (+)            | 64.1% (+)            |
| Mean comprehensive PCAT score of entering class                                                                                                                                                                            | 57.9% (+)            | 53.7% (-)            | 54.3% (-)            |
| Aggregate percentage of admitted class with prior degree (Bachelor of Arts, Bachelor of Science, or Mster of Science)                                                                                                      | 58.5% (-)            | 63.8% (+)            | 57.9% (+)            |
| Percentage of applications from out-of-state schools                                                                                                                                                                       | 51.3% (+)            | 50.0% (+)            | 56.4% (+)            |
| Percentage of entering class from top-ranked Virginia feeder school (Christopher Newport University, George Mason University, James Madison University, VCU, Virginia Tech, University of Virginia, and William & Mary)    | 59.0% (+)            | 52.1% (+)            | 50.0% (+)            |
| Mean cumulative undergraduate GPA of <u>total applicants</u>                                                                                                                                                               |                      | 65.2% (-)            | 61.5% (-)            |
| Mean cumulative undergraduate science GPA of <u>total applicants</u>                                                                                                                                                       |                      | 65.2% (-)            | 73.7% (-)            |
| Mean comprehensive PCAT score of <u>total applicants</u>                                                                                                                                                                   |                      | 81.8% (-)            |                      |
| Percentage of <u>applicants</u> from top-ranked Virginia feeder school (Christopher Newport University, George Mason University, James Madison University, VCU, Virginia Tech, University of Virginia, and William & Mary) |                      | 60.9% (-)            | 61.0% (-)            |
| Percentage of entering class that identifies as an underrepresented minority                                                                                                                                               |                      | 75.6% (+)            | 92.3% (+)            |
| Number of recruitment events (e.g., immersion events for middle school, high school and undergraduate students, and off-campus events)                                                                                     |                      | 53.5% (+)            | 55.0% (-)            |
| <b>Module 2: Community Outreach</b>                                                                                                                                                                                        |                      |                      |                      |
| Number of formal partnerships (local, national, international)*                                                                                                                                                            | Mandatory            | Mandatory            | Mandatory            |
| Percentage of community partners who rate contributions of SOP Faculty and students as “Excellent” for addressing community needs                                                                                          | 78.4% (+)            | 76.1% (+)            | 75.0% (+)            |
| Duration of existing partnerships (mean and range)                                                                                                                                                                         | 59.0% (-)            | 55.8% (-)            | 60.5% (-)            |
| Percentage of full-time faculty and staff who submit community service leave                                                                                                                                               | 65.1% (-)            | 69.8% (-)            | 74.4% (-)            |
| Percentage of full-time faculty and staff who partake but do not submit community service leave                                                                                                                            |                      | 70.0% (-)            | 78.4% (-)            |
| Number of aggregate hours of student community service                                                                                                                                                                     |                      | 75.0% (+)            | 86.5% (+)            |
| Number of aggregate hours of faculty community service                                                                                                                                                                     |                      | 60.5% (+)            | 56.8% (+)            |
| Number of students who participate in domestic and international outreach events                                                                                                                                           |                      | 65.1% (+)            | 70.3% (+)            |
| <b>Module 3: Continuing Education</b>                                                                                                                                                                                      |                      |                      |                      |
| Number of continuing education programs offered                                                                                                                                                                            | 75.0% (+)            | 83.0% (+)            |                      |
| Number of hours in continuing education units                                                                                                                                                                              | 56.8% (+)            | 52.3% (+)            | 52.8% (-)            |
| Percentage of continuing education programs with an average score of 3.5/4.0 (reworded below)                                                                                                                              | 59.0% (+)            |                      |                      |
| Average satisfaction score of all continuing education programs                                                                                                                                                            |                      | 77.3% (+)            | 91.7% (+)            |
| Number of joint accreditation programs                                                                                                                                                                                     |                      | 62.2% (-)            | 61.8% (-)            |

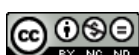

| Key Performance Indicator                                                                                                                                                                             | Delphi Round         |                      |                      |
|-------------------------------------------------------------------------------------------------------------------------------------------------------------------------------------------------------|----------------------|----------------------|----------------------|
|                                                                                                                                                                                                       | R1<br>(≥90%)<br>n=49 | R2<br>(≥80%)<br>n=51 | R3<br>(≥75%)<br>n=42 |
| Number of new continuing education programs offered                                                                                                                                                   |                      | 57.4% (-)            | 63.2% (-)            |
| Number of unique continuing education participants                                                                                                                                                    | 54.3% (+)            | 55.0% (+)            | 50.0% (+)            |
| Number of participants attending 2 or more programs                                                                                                                                                   | 86.1% (-)            | 70.7% (-)            | 74.3% (-)            |
| Net revenue generated                                                                                                                                                                                 | 63.2% (+)            | 70.7% (+)            | 84.6% (+)            |
| <b>Module 4: Diversity</b>                                                                                                                                                                            |                      |                      |                      |
| Percentage of underrepresented minority PharmD students, Master and PhD students, faculty members, and staff members (includes Black/African-American, Hispanic/LatinX, American Indian)*             | Mandatory            | Mandatory            | Mandatory            |
| Percentage of <u>overall</u> faculty, students and staff who feel the SOP is welcoming to those with diverse backgrounds                                                                              | 89.4% (+)            | 95.8% (+)            |                      |
| Percentage of Black/African-American faculty, students and staff who feel the SOP is welcoming to those with diverse backgrounds                                                                      |                      | 61.9% (+)            | 53.8% (-)            |
| Percentage of American Indian faculty, students and staff who feel the SOP is welcoming to those with diverse backgrounds                                                                             |                      | 54.8% (+)            | 61.5% (-)            |
| Percentage of Hispanic/LatinX faculty, students and staff who feel the SOP is welcoming to those with diverse backgrounds                                                                             |                      | 57.1% (+)            | 53.8% (-)            |
| Percentage of White faculty, students and staff who feel the SOP is welcoming to those with diverse backgrounds                                                                                       |                      | 54.8% (+)            | 53.8% (-)            |
| Percentage of Asian faculty, students and staff who feel the SOP is welcoming to those with diverse backgrounds                                                                                       |                      |                      | 53.8% (-)            |
| Percentage of underrepresented minority faculty, students and staff who feel the SOP is welcoming to those with diverse backgrounds                                                                   |                      |                      | 87.5% (+)            |
| Percentage of underrepresented minority and women in School leadership positions (deans, chairs, vice chairs, directors)                                                                              | 83.7% (+)            | 85.1% (+)            |                      |
| Percentage of underrepresented minority student leaders                                                                                                                                               |                      | 57.1% (+)            | 54.1% (+)            |
| Percentage of underrepresented minority national student awards                                                                                                                                       |                      | 62.8% (-)            | 68.4% (-)            |
| Percentage of underrepresented minority faculty by department                                                                                                                                         |                      | 63.0% (+)            | 70.0% (+)            |
| <b>Module 5: Faculty Experience and Success</b>                                                                                                                                                       |                      |                      |                      |
| Faculty attrition rate (except retirements)*                                                                                                                                                          | Mandatory            | Mandatory            | Mandatory            |
| Percentage of faculty who are satisfied with the VCU SOP (combination of items from the AACP faculty survey)                                                                                          | 95.6% (+)            |                      |                      |
| Percentage of faculty who believe that they have adequate resources                                                                                                                                   | 81.8% (+)            | 86.7% (+)            |                      |
| Number of awards received by faculty                                                                                                                                                                  | 60.0% (+)            | 68.3% (+)            | 59.5% (+)            |
| Percentage of faculty members serving as leaders in state / national organizations (elected officers or appointed chairs)                                                                             | 69.0% (+)            | 77.8% (+)            | 82.9% (+)            |
| Percentage of clinical faculty with postgraduate certification (include Board of Pharmaceutical Specialties, Certified Diabetes Educator, Certified Lipid Specialist, Certified Geriatric Pharmacist) | 68.4% (+)            | 69.8% (+)            | 73.7% (+)            |
| Percentage of SOP required courses with average student course evaluation score > 3.3/4                                                                                                               | 58.5% (+)            | 59.6% (+)            | 65.8% (+)            |
| Percentage of faculty salaries equal to or exceeding the AACP 50th percentile                                                                                                                         | 88.4% (+)            | 87.0% (+)            |                      |
| Percentage of faculty who feel valued at work                                                                                                                                                         |                      |                      | 77.5% (+)            |
| <b>Module 6: Staff Experience and Success</b>                                                                                                                                                         |                      |                      |                      |
| Percentage of staff who are satisfied with the VCU SOP                                                                                                                                                | 95.7% (+)            |                      |                      |
| Percentage of staff who believe that they have adequate professional development                                                                                                                      | 81.8% (+)            | 81.6% (+)            |                      |
| Staff attrition rate (except retirements)                                                                                                                                                             | 81.8% (+)            | 87.2% (+)            |                      |
| Percentage of staff with long-term career goals unrelated to their current SOP employed role                                                                                                          |                      | 73.7% (-)            | 75.0% (-)            |
| Percentage of staff who feel valued at work                                                                                                                                                           |                      |                      | 82.9% (+)            |

| Key Performance Indicator                                                                                                                                                                                                                                                                       | Delphi Round         |                      |                      |
|-------------------------------------------------------------------------------------------------------------------------------------------------------------------------------------------------------------------------------------------------------------------------------------------------|----------------------|----------------------|----------------------|
|                                                                                                                                                                                                                                                                                                 | R1<br>(≥90%)<br>n=49 | R2<br>(≥80%)<br>n=51 | R3<br>(≥75%)<br>n=42 |
| Percentage of staff who feel less included or less important than faculty as it relates to being recognized as a valued member of SOP                                                                                                                                                           |                      |                      | 57.5% (-)            |
| Percentage of staff with related professional designations (e.g., Human resources designation for the human resources staff, professional student-assistance designation for admissions or office of experiential education staff, grant, finance, professional secretarial designations, etc.) |                      |                      | 61.1% (-)            |
| <b>Module 7: Fundraising</b>                                                                                                                                                                                                                                                                    |                      |                      |                      |
| Total amount of private funds received as cash gifts annually                                                                                                                                                                                                                                   | 90.9% (+)            |                      |                      |
| Size of SOP Endowment and percent change from previous year                                                                                                                                                                                                                                     | 87.8% (+)            | 78.7% (+)            | 77.8% (+)            |
| Total amount of new gifts pledged annually                                                                                                                                                                                                                                                      | 84.1% (+)            | 83.0% (+)            |                      |
| Percentage of alumni who participate in the annual giving                                                                                                                                                                                                                                       | 73.8% (+)            | 85.1% (+)            |                      |
| Percentage of faculty and staff who participate in annual giving                                                                                                                                                                                                                                | 52.3% (+)            | 60.0% (+)            | 61.5% (+)            |
| Number of new donors (unique) in the past year                                                                                                                                                                                                                                                  | 66.7% (+)            | 66.7% (+)            | 70.3% (+)            |
| Total amount of funds raised, including private funds received as cash gifts (#1) and new gifts pledged annually (#3)                                                                                                                                                                           |                      | 84.1% (+)            |                      |
| Number of annual solicitations                                                                                                                                                                                                                                                                  |                      | 55.3% (-)            | 59.5% (-)            |
| Percent of solicitations closed annually                                                                                                                                                                                                                                                        |                      | 60.0% (-)            | 55.9% (-)            |
| <b>Module 8: Graduate Program</b>                                                                                                                                                                                                                                                               |                      |                      |                      |
| Percentage of graduate students completing their degree who are satisfied with their training                                                                                                                                                                                                   | 95.5% (+)            |                      |                      |
| Percentage of PhD students achieving candidacy by Spring Semester 3rd year                                                                                                                                                                                                                      | 54.3% (+)            | 65.1% (+)            | 71.9% (+)            |
| Percentage of eligible students submitting an individual training grant (e.g., F30, F31, R25)                                                                                                                                                                                                   | 56.7% (-)            | 59.5% (+)            | 54.8% (+)            |
| Percentage of PhD students presenting at national or international scientific conference before the dissertation year                                                                                                                                                                           | 65.7% (+)            | 69.0% (+)            | 82.9% (+)            |
| Percentage of students with at least 1 first author original research peer-reviewed article by PhD defense (in press or published)                                                                                                                                                              | 61.8% (+)            | 71.8% (+)            | 76.5% (+)            |
| Percentage of students employed as a post doc or a position in government, industry, or related field within 6 months of PhD graduation                                                                                                                                                         | 87.5% (+)            | 90.7% (+)            |                      |
| Percentage of Graduate Teaching Assistants receiving satisfactory evaluations                                                                                                                                                                                                                   | 51.2% (+)            | 59.1% (+)            | 51.3% (+)            |
| Total number of graduate faculty                                                                                                                                                                                                                                                                |                      |                      | 51.4% (-)            |
| Graduate faculty to graduate student ratio                                                                                                                                                                                                                                                      |                      |                      | 61.1% (+)            |
| Percentage of graduate faculty not advising graduate students                                                                                                                                                                                                                                   |                      |                      | 50.0% (+)            |
| <b>Module 9: Research and Scholarship</b>                                                                                                                                                                                                                                                       |                      |                      |                      |
| Total amount of grant funds awarded in fiscal year (all sources) and average \$ per full-time Faculty*                                                                                                                                                                                          | Mandatory            | Mandatory            | Mandatory            |
| Number of grant applications awarded in fiscal year*                                                                                                                                                                                                                                            | Mandatory            | Mandatory            | Mandatory            |
| Number of peer reviewed journal publications (average number per full-time faculty member)                                                                                                                                                                                                      | 92.7% (+)            |                      |                      |
| NIH Funding Ranking (AACP and Blue Ridge Institute for Medical Research)                                                                                                                                                                                                                        | 92.1% (+)            |                      |                      |
| Number of multi-school grants awarded in fiscal year (regardless of whether SOP faculty are the PI)                                                                                                                                                                                             | 56.4% (-)            | 54.5% (-)            | 52.9% (-)            |
| Number of collaborative grants between members of the SOP and other VCU schools or other external schools                                                                                                                                                                                       |                      | 54.3% (+)            | 52.8% (+)            |
| Number of SOP faculty article citations                                                                                                                                                                                                                                                         |                      | 58.1% (-)            | 54.3% (-)            |
| Total dollar amount of external competitive research funds obtained by faculty with 100% effort dedicated to research                                                                                                                                                                           |                      | 51.5% (-)            | 61.8% (-)            |
| Total dollar amount of external competitive research funds obtained by faculty                                                                                                                                                                                                                  |                      |                      | 77.1% (+)            |
| Total dollar amount of external competitive research funds                                                                                                                                                                                                                                      |                      |                      | 51.6% (-)            |

| Key Performance Indicator                                                                                                                                                                                                                                                                                                                                      | Delphi Round         |                      |                      |
|----------------------------------------------------------------------------------------------------------------------------------------------------------------------------------------------------------------------------------------------------------------------------------------------------------------------------------------------------------------|----------------------|----------------------|----------------------|
|                                                                                                                                                                                                                                                                                                                                                                | R1<br>(≥90%)<br>n=49 | R2<br>(≥80%)<br>n=51 | R3<br>(≥75%)<br>n=42 |
| obtained per total faculty effort dedicated to research                                                                                                                                                                                                                                                                                                        |                      |                      |                      |
| Percentage of National Institutes of Health R01s with active underserved / minority graduate student supplements                                                                                                                                                                                                                                               |                      |                      | 54.8% (-)            |
| <b>Module 10: Student Experience and Success</b>                                                                                                                                                                                                                                                                                                               |                      |                      |                      |
| NAPLEX and Multistate Pharmacy Jurisprudence Examination pass rate for first-time exam takers exceeds US average*                                                                                                                                                                                                                                              | Mandatory            | Mandatory            | Mandatory            |
| Four-year attrition rate for PharmD students (total and by demographics of age, gender, and race)*                                                                                                                                                                                                                                                             | Mandatory            | Mandatory            | Mandatory            |
| Percentage of graduating class with pharmacy jobs within 6 months of graduation*                                                                                                                                                                                                                                                                               | Mandatory            | Mandatory            | Mandatory            |
| Percentage of graduating students who are satisfied with the VCU SOP PharmD Program                                                                                                                                                                                                                                                                            | 97.8% (+)            |                      |                      |
| Percentage of P1-P3 students who are satisfied with the VCU SOP Doctor of Pharmacy Program                                                                                                                                                                                                                                                                     | 76.7% (+)            | 87.0% (+)            |                      |
| Percentage of graduating students who would choose the VCU SOP again for their pharmacy education                                                                                                                                                                                                                                                              | 70.5% (+)            | 85.4% (+)            |                      |
| Percentage of PharmD students (a) seeking and (b) obtaining (i.e. match rate) a residency (# obtained divided by # submitted rank list)                                                                                                                                                                                                                        | 82.9% (+)            | 95.3% (+)            |                      |
| Average score on Advanced Pharmacy Practice Experiences Professional Competency Evaluations by preceptors                                                                                                                                                                                                                                                      | 63.2% (-)            | 56.8% (-)            | 65.7% (-)            |
| Number of national and state awards received by students                                                                                                                                                                                                                                                                                                       | 53.8% (-)            | 53.2% (+)            | 52.6% (+)            |
| <b>Abbreviations:</b> AACP, American Association of Colleges of Pharmacy; GPA, grade point average; NAPLEX, North American Pharmacist Licensure Examination; NIH, National Institutes of Health; PCAT, Pharmacy College Admission Test; PharmD, Doctor of Pharmacy; PhD, Doctor of Philosophy; SOP, School of Pharmacy; VCU, Virginia Commonwealth University. |                      |                      |                      |
